# Supplementary material
Source: PubMed Central journal article supplement (PMC4101383)
Supplement: NIHMS609668-supplement-Kelliher_Supplements.pdf [file NIHMS609668-supplement-Kelliher_Supplements.pdf]

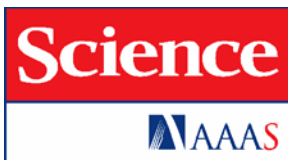

# Supplementary Materials for

## Hypoxia Triggers Meiotic Fate Acquisition in Maize

Timothy Kelliher\* and Virginia Walbot\*

\*E-mail: [tkelliher1@stanford.edu](mailto:tkelliher1@stanford.edu) (T.K.); [walbot@stanford.edu](mailto:walbot@stanford.edu) (V.W.)

Published 20 July 2012, *Science* **337**, 345 (2012)

DOI: 10.1126/science.1220080

### This PDF file includes:

Materials and Methods  
Figs. S1 to S14  
Tables S1 to S4  
References (28–33)

## Materials and Methods

### qRT-PCR

*mac1* was cloned and the gene encodes the closest maize homolog to TPD1, a putative secreted ligand (7). qRT-PCR was used to quantify the expression of *Mac1*. Samples included 1 mm tassel (containing spikelet pair meristems), 5 mm tassel (containing spikelet meristems), and 10 mm tassel (containing stamen primordia), and 50, 150, 250, 400, and 700  $\mu$ m fertile anthers (primordia, archesporial (AR) cell specification, secondary parietal layer and endothecium specification, mitotic proliferation, middle layer and tapetum formation). Stages are described in figure S1E. Samples of 200  $\mu$ m *mac1* (excess AR) and *msca1* (zero AR) mutant anthers were also tested. RNA was extracted with TRIzol reagent (Ambion, Austin, Texas) from anthers snap frozen in liquid nitrogen within 20 min of dissection, except in the case of laser microdissected cell types (described below). Extraction was followed by chloroform/isopropanol precipitation and resuspension in RNase-free H<sub>2</sub>O. All RNA samples were DNase treated with RNase-free DNase (Qiagen, Venlo, The Netherlands), purified on an RNAeasy mini spin column (Qiagen), and quantified on a Nanodrop 1000 spectrophotometer (Thermo Scientific, Waltham, MA).

In addition, we tested *Mac1* expression in a cell-type specific manner by performing qRT-PCR on laser-microdissected AR and somatic (SPL + endothecium) samples isolated from 300 and 700  $\mu$ m fertile anthers. Anthers were fixed in 3:1 ethanol: acetic acid solution, then cryoprotected in 15% sucrose/PBS and embedded in optimal cutting temperature compound (Ted Pella Inc., Redding, CA). They were then frozen, cryo-sectioned and attached to slides with a Cryojane (Electron Microscopy Sciences, Hatfield, PA). After an ethanol to xylenes dehydration series, 10-12  $\mu$ m sections were microdissected using the Zeiss P.A.L.M. Laser Microbeam (<http://www.palm-microlaser.com>) for recovery of cell types. RNA was isolated using the PicoPure RNA extraction kit (Arcturus Molecular Devices, Mountain View, CA), with on-column DNase treatment and resuspension in RNase-free dH<sub>2</sub>O as described above for whole anther RNA.

After quantification, whole anther and microdissected RNA biological replicates were used for cDNA synthesis using the SuperScript III First-Strand Synthesis System for RT-PCR (Invitrogen, Carlsbad, CA) using oligo (dT)<sub>20</sub>. Each qRT-PCR reaction was performed in technical triplicate on cDNA derived from 8-10 ng starting mRNA with SYBRGreenER qPCR SuperMix (Invitrogen) on an Opticon 2 thermocycler (Bio-Rad, Richmond, CA) and fluorescence values were analyzed using PCR miner (<http://www.ewindup.info/miner/version2/>) to account for primer efficiencies. *Mac1* transcript was detected using a forward primer in exon 1 (5'-AACCCTACTGCGAAACAAC-3'), and a reverse primer that spans exons 2 and 3 (5'-CGAGAATCCTGCGTCCTGAT-3') so as to avoid amplifying contaminating genomic DNA. Cyanase was used as a control gene (Forward: 5'-GGTGGTCACATTTGATGGG-3'; Reverse: 5'-CTGAGCCCGATACCAACC-3'). The

ratio of *Mac1* to *Cyanase* was used to normalize expression among biological samples. Each sample type was tested in biological triplicate.

#### Microarray analysis

Two microarray experiments were performed. The goal of the first experiment was to test the expression profiles of *mac1* AR cells with respect to a set of 297 meiosis-associated genes (12). AR cells microdissected from *mac1* anthers were compared to laser microdissected AR from fertile (*mac1* heterozygous) sibling anthers. Anthers were at the 5-cell layer stage (1.0 mm anther length), after all AR mitoses are completed during a period of AR expansion. In a separate experiment designed to profile the early archesporial cell transcriptome, 600-700  $\mu$ m fertile whole anthers were compared to laser microdissected AR cells from the same stage. To control for growth condition differences between plants, whole anthers and microdissected anthers were collected from the same individual plants to permit a direct comparison between anthers of the same tassel.

Both experiments were done in biological duplicate, each with two technical replicates (dye swap); 50 ng total RNA was used for amplification according to the Agilent Two-Color Microarray-Based Gene Expression Analysis Low Input Quick Amp Labeling Protocol (version 6.5, May 2010) (Santa Clara, CA) and hybridized in 4x44K format (Part number: G2519F; Design ID: 016047). Background fluorescence cut off was set and data were normalized as described (28). Genes were identified as being above background based on expression at least 3 standard deviations above the mean intensity of negative control probes (false discovery rate  $p < 0.001$ ).

#### Tassel manipulations

The oxygen probe was an Oxygraph Tx3 (NTH-Pst1-L5-NS40-0.8-YOP) obtained from Presens (Regensburg, Germany, <http://www.presens.de>). All chemicals were obtained from Sigma Chemical Co. (St. Louis, MO) and dissolved in water at the indicated molarities and injected using a 26 gauge needle into the airspace surrounding the immature tassel. Cellular redox was perturbed chemically by injecting 1 mL of 1 mM  $H_2O_2$  or 10 mM KI (a peroxide scavenger). Two promoters of ROS were tried: 200  $\mu$ M PTIO and 100  $\mu$ M L-NNA. 20  $\mu$ M SNP, a ROS inhibitor, was also employed. A water injection showed no difference from needle puncture alone, so the latter was used as control for injections.

Confocal imaging, and EdU and PI staining were performed as described previously (13). Measurements were made with the length tool in the Volocity software package (Perkin Elmer, version 5.1.1, Waltham, MA).

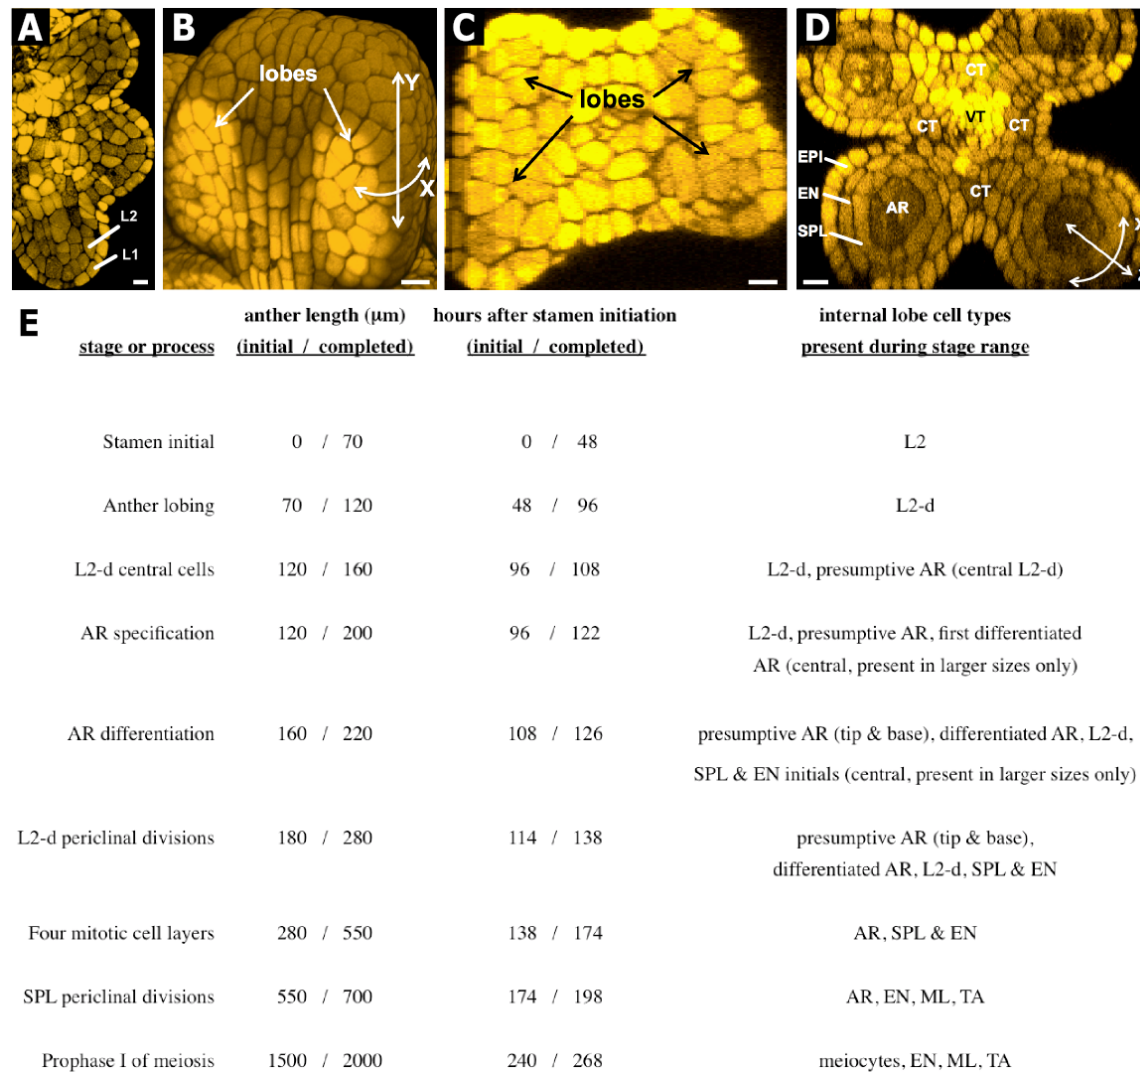

**Fig. S1**

Introduction to early anther development and timeline of events. Anther development begins with three stamen primordia initiating from a floret meristem (**A**). Three 55-μm dome-like stamen primordia are visible in this longitudinal optical section of a maize tassel floret. The L1 layer gives rise exclusively to the epidermis, while the L2 subepidermal layer generates the internal lobe tissues, including both somatic and germinal cell types. This dome shape gradually converts to the butterfly shape with lobe protrusion (**B**). In this 3D composite of a 100-μm anther, two adaxial lobes are visible along with the filament at the bottom of the image. Axes are as follows: Y, longitudinal; X, circumferential; and Z, radial. (**C**) Transverse reconstruction of a 110-μm anther showing budding lobes and central vasculature. All lobes have L2-d cells and no central (presumptive archesporial [AR]) cells are seen. (**D**) After two days and a 3X increase in anther length and girth accomplished by cell division with a constant average cell size, AR cells are located in the middle of lobes, surrounded by two concentric rings of

somatic cells, the secondary parietal layer (SPL) and endothecium (EN), enclosed by the epidermis (EPI) and connective tissue (CT). All of these cell types are visible in this transverse reconstruction of a 300  $\mu\text{m}$  anther. Over the next seven days AR cells proliferate, differentiate as pollen mother cells, and initiate meiosis. Meanwhile each somatic cell type exhibits a distinctive pattern of proliferation and expansion (13). Multipotent SPL cells divide periclinally once and daughter cells terminally differentiate into middle layer and tapetum. The latter surrounds the meiocytes (29) and supports later pollen maturation. The defining characteristics of AR cells with our stain under confocal microscopy are enlargement, amorphous shape, a small gap between cells, and a dark, diffuse cytoplasmic stain. In transverse sections for light microscopy, there is no gap: AR cells have thin adjoining walls. The difference between the two types of microscopic observation probably results from the fixative used (ethanol in the propidium iodide / confocal protocol; formaldehyde for light microscopy). Scale bar = 15  $\mu\text{m}$ . **(E)** Key developmental events of wild type W23 inbred anther development spanning stamen initiation through meiosis. Each developmental stage or process is assigned a range of anther lengths in micrometers and time after stamen initiation in hours. Also listed on the right are the different internal lobe cell types present during each range. Many of the stages overlap because when the anther is viewed longitudinally, the center is more advanced than the base and tip. ML, middle layer; TA, tapetum.

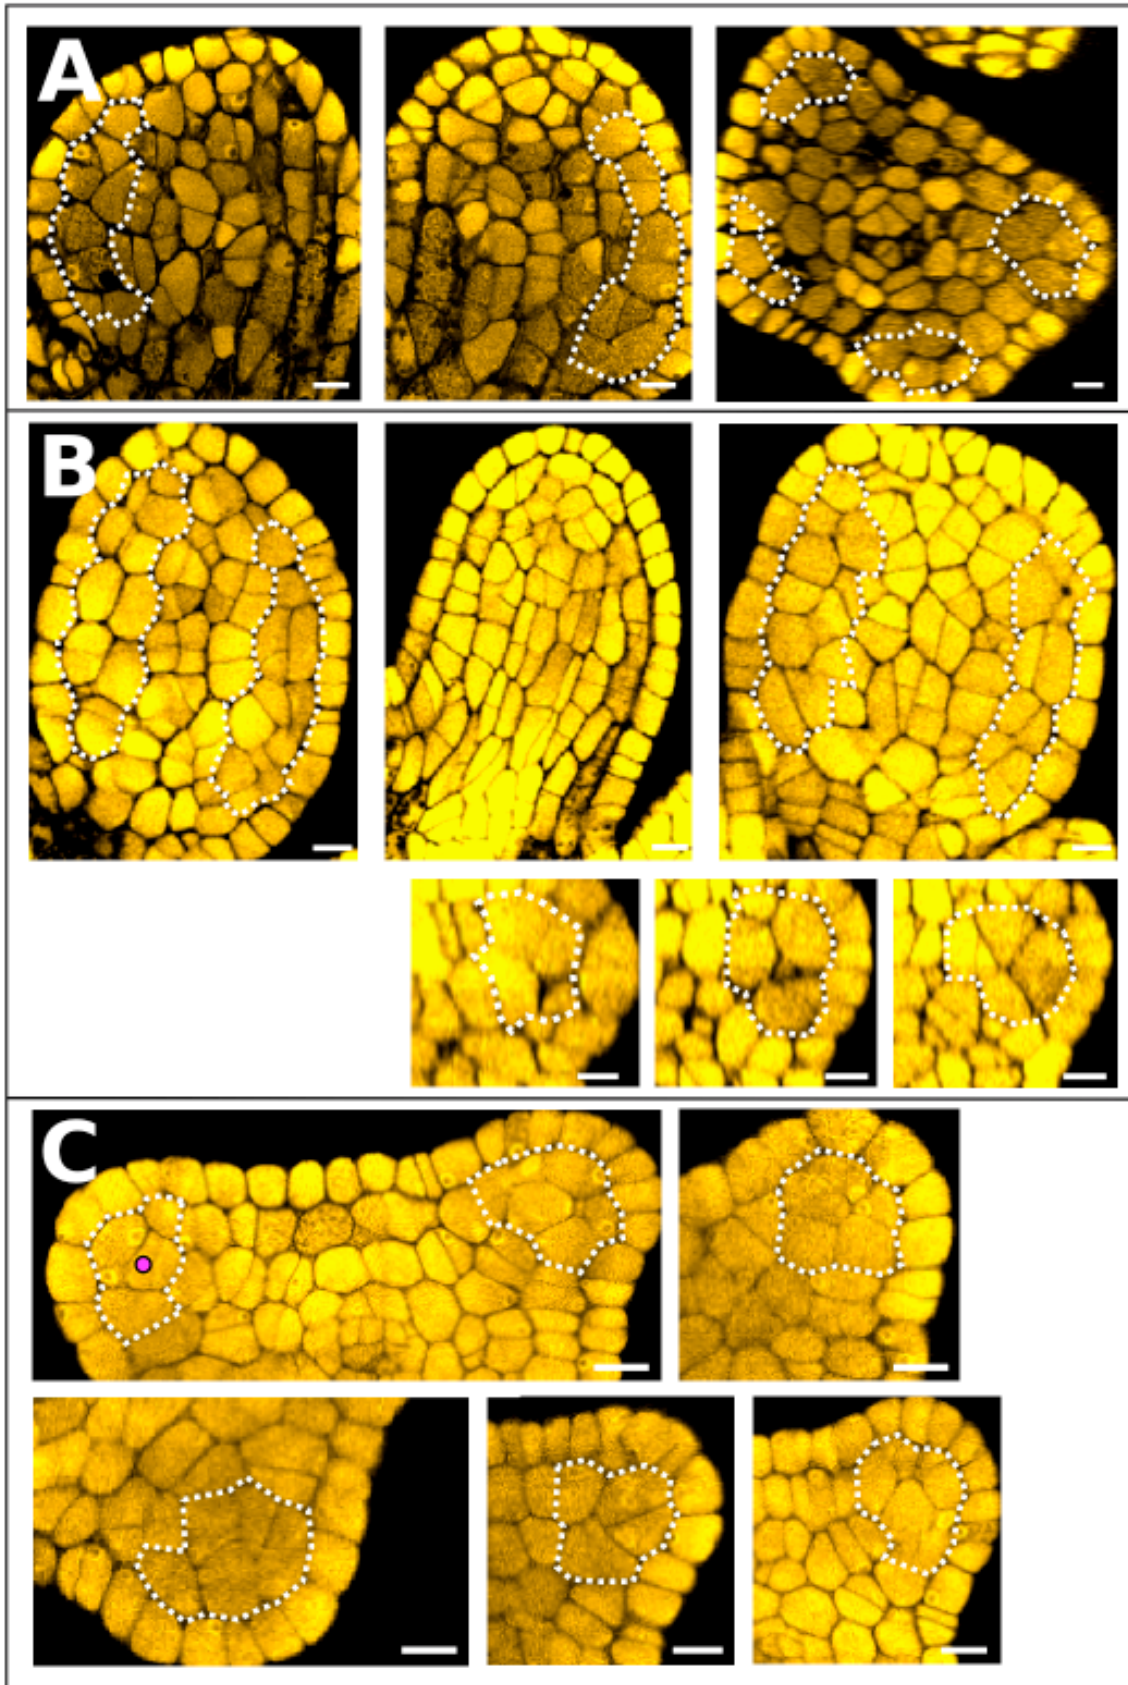

## Fig. S2

Early anther lobes are multicellular and there is no evidence for an enlarged hypodermal cell as described in the lineage model of germinal cell fate specification (see below). L2-d progenitor cells (white outline) will give rise to either somatic or germinal cell types or both. (A) 90- $\mu\text{m}$  anther: longitudinal images (*left, center*) and transverse reconstruction (*right*). The only cells outlined were within the lobe bulge in all views. (B) 105- $\mu\text{m}$  anther showing longitudinal images of adaxial lobes (*left*), central vasculature composed of organized cell columns (*center*), and abaxial lobes (*right*). *Below*, three transverse reconstructions of the same anther showing single lobes. (C) 118- $\mu\text{m}$  anther, transverse images of different parts of the four lobes. One of the lobes (*top left*) contains a single presumptive archesporial (AR) cell (pink dot) derived from division of an internal L2-d progenitor. We designate this an AR cell because of its position surrounded completely by other L2-d lobe cells in the complete series of confocal images. Scale bar = 15  $\mu\text{m}$ .

Several conventions have arisen to name the cells in immature anthers, based on different assumptions about their roles in anther ontogeny. The textbook view is that lineage defines cell fate and that there exists an enlarged hypodermal cell in the four corners of anther primordia that divides asymmetrically to establish the somatic and germinal lineages and fates in a single division. The classical nomenclature of “hypodermal cell”, “primary parietal cell”, and “primary sporogoneous cell” assumes this lineage model of anther cell type specification. As this report presents the first three-dimensional reconstruction of anther development during the period of reproductive fate specification and our results contradict the classical lineage view, we propose new vocabulary to reflect the developmental patterns observed. We prefer L2-d to describe the multipotent cells which can give rise to any of the internal lobe cell types, and presumptive archesporial cells to describe cells that end up in the center of the lobe in early anthers (all of which are central L2-d cells that acquire an archesporial cell fate). The archesporial cells are instructive in directing neighboring cells to restrict from pluripotent L2-d to two cell types (endothecium and secondary parietal layer) as a result of periclinal division. Our results indicate a sequential specification: initially all L2-d, then archesporial and L2-d, and then archesporial, endothecium and secondary parietal layer.

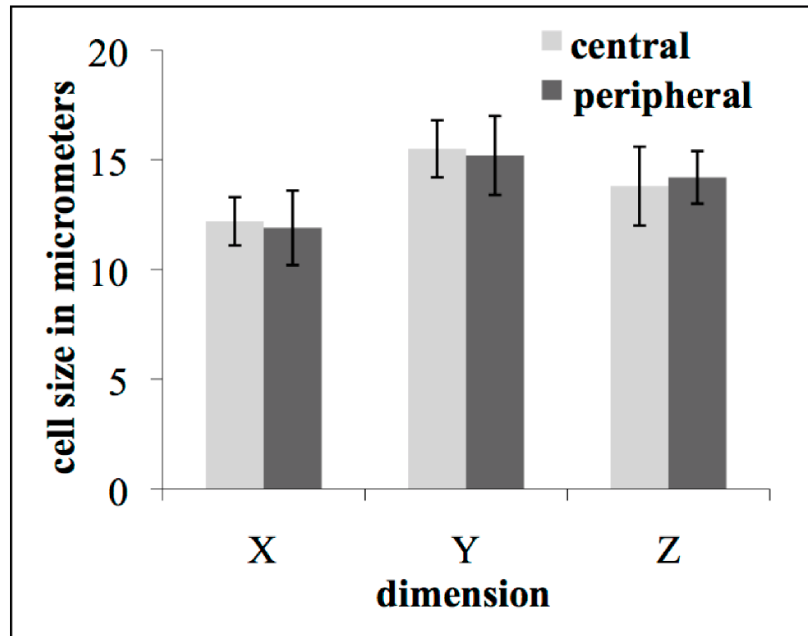

**Fig. S3**

Archesporial-generative divisions are symmetric. The dimensions of presumptive archesporial cells and somatic sisters were equal in W23. Measurements were made with the length tool in Volocity in the circumferential (X), longitudinal (Y), and radial (Z) dimensions (N = 48). Values are averages  $\pm$  s.d. indicated by the error bars. There was no significant difference in any dimension.

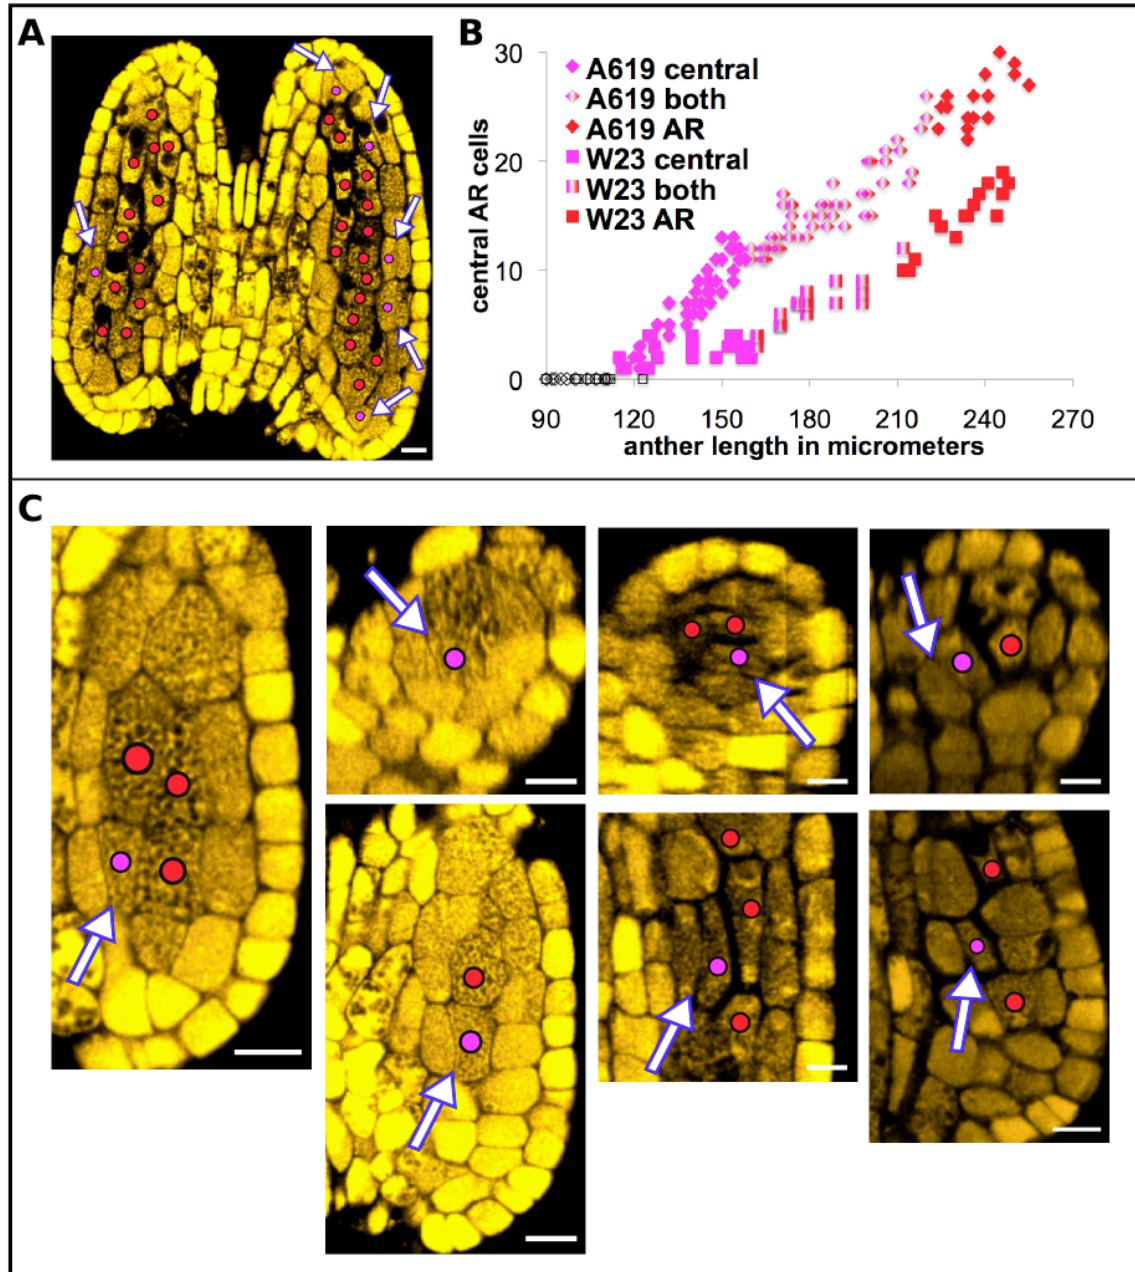

**Fig. S4**

After morphometric analysis, inbred A619 had identical developmental progression but extra archesporial cells compared to inbred W23. A619 was chosen for comparison with W23 because it has a slower flowering progression and fewer flowers per tassel than W23. The general developmental patterns observed were identical between the two inbreds: multiple L2-d progenitors occupied early lobes, there was no evidence for a hypodermal cell, and presumptive archesporial cells derived from apical, lateral, and basal positions in the lobe. **(A)** 170-μm anther from A619. In A619 there are ultimately two archesporial cell columns produced during the specification period, compared to just one in W23. **(B)** Quantification of archesporial cells over the period of germinal cell

specification in both A619 and W23. There were 2X more archesporial (AR) cells in A619 than W23 at each stage. In both inbreds, the first presumptive archesporial cells born are surrounded by L2-d with additional presumptive archesporial cells being specified from successive divisions in different progenitors in the center, base and tip. These observations confirm the multiclonal origin of germinal cells in each lobe. As in W23, archesporial cell specification lasted from 120 to 220  $\mu\text{m}$  with morphological differentiation apparent at 160  $\mu\text{m}$  in the central most archesporial cells of the column. In particular, the range from 160-220  $\mu\text{m}$  is complex because at the same time that archesporial (AR) cells are enlarging centrally and periclinal divisions are occurring in the encircling L2-d ring to give rise to secondary parietal layer (SPL) and endothecium (EN) initials, there are new presumptive AR being born from L2-d progenitors at the tapered tip and base of the anther. Somatic differentiation initiated and completed at the same stages as W23. (C) The inner column of AR in A619 primarily derives from divisions in lateral or basal positions. These divisions simultaneously give rise to central presumptive AR and subtending somatic daughter cells adjacent to the connective tissue. *Left*, longitudinal section with presumptive AR born from an internal progenitor. Differentiated archesporial cells are visible above and to the right of the presumptive archesporial cell. *Top right*, three transverse reconstructions with internal archesporial births into the central column where archesporial cells are found slightly later. *Bottom*, three longitudinal images with internal archesporial births into central columns already containing archesporial cells. Pink dots, presumptive archesporial cells; red dots, differentiating archesporial cells; white arrows, cell walls separating presumptive archesporial and somatic sister cells. Scale bar = 15  $\mu\text{m}$ .

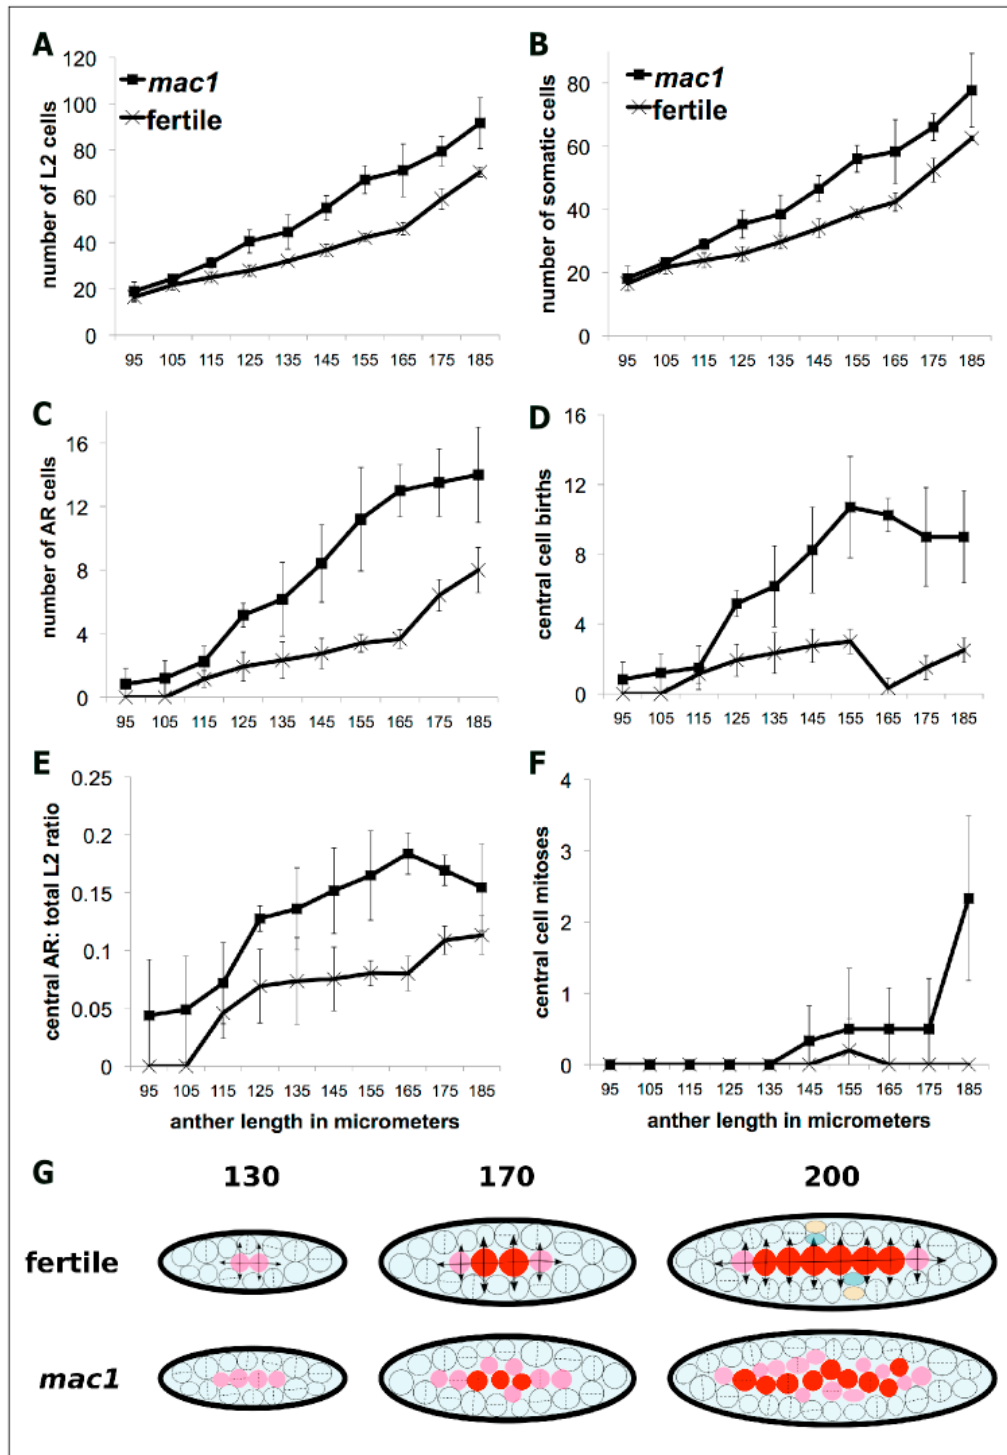

**Fig. S5**

Male sterile *mac1* and fertile sibling cell counts detail the excess L2-d and archesporial (AR) cells characteristic of the *mac1* phenotype. Each point represents the average count of at least 16 lobes  $\pm$  s.d. (A) *mac1* had supernumerary L2-d cells in the smallest anthers imaged, and the gap between sterile and fertile widened until 165  $\mu$ m, when it

began to close. Excess cells in *mac1* were located in the somatic ring **(B)** as well as the central presumptive archesporial cell column **(C)**. **(B)** As the somatic bilayer formed in fertile anthers (>180  $\mu\text{m}$  anther length) the difference in somatic cell number decreased, and by 230  $\mu\text{m}$  (not shown) fertile overtook *mac1* because *mac1* lobes continued to contain only a single L2-d layer. **(C)** Central presumptive archesporial cells were found in smaller anthers in *mac1* than in fertile (including in some 95  $\mu\text{m}$  long anthers). This is a consequence of excess L2 progenitor proliferation (these cells were also smaller than in fertile (data not shown)), resulting in more cells positioned internally surrounded completely by L2-d neighbors. **(D)** Furthermore, more additional archesporial cell births occurred in *mac1* than in equivalently sized fertile anthers in 125-185  $\mu\text{m}$  lobes. Many of the extra archesporial-generative divisions were periclinal divisions in the ring surrounding differentiated archesporial cells, a case rarely found in fertile anthers. **(E)** The ratio of archesporial cells to total L2 is indicative of excessive proliferation (given the circular architecture of the tissue in cross-section, additional cells must be located in the middle, becoming a higher fraction of the total cells in *mac1* than in fertile). **(F)** *mac1* archesporial cells are mitotic at early stages, a trait observed only rarely in fertile lobes. **(G)** Longitudinal diagrams of early fertile and *mac1* lobe development (numbers indicate anther length in micrometers). Pink cells are just specified AR and red cells are differentiated AR. Arrows indicate the proposed direction of MAC1 protein secretion from archesporial cells to neighboring L2-d tissues.

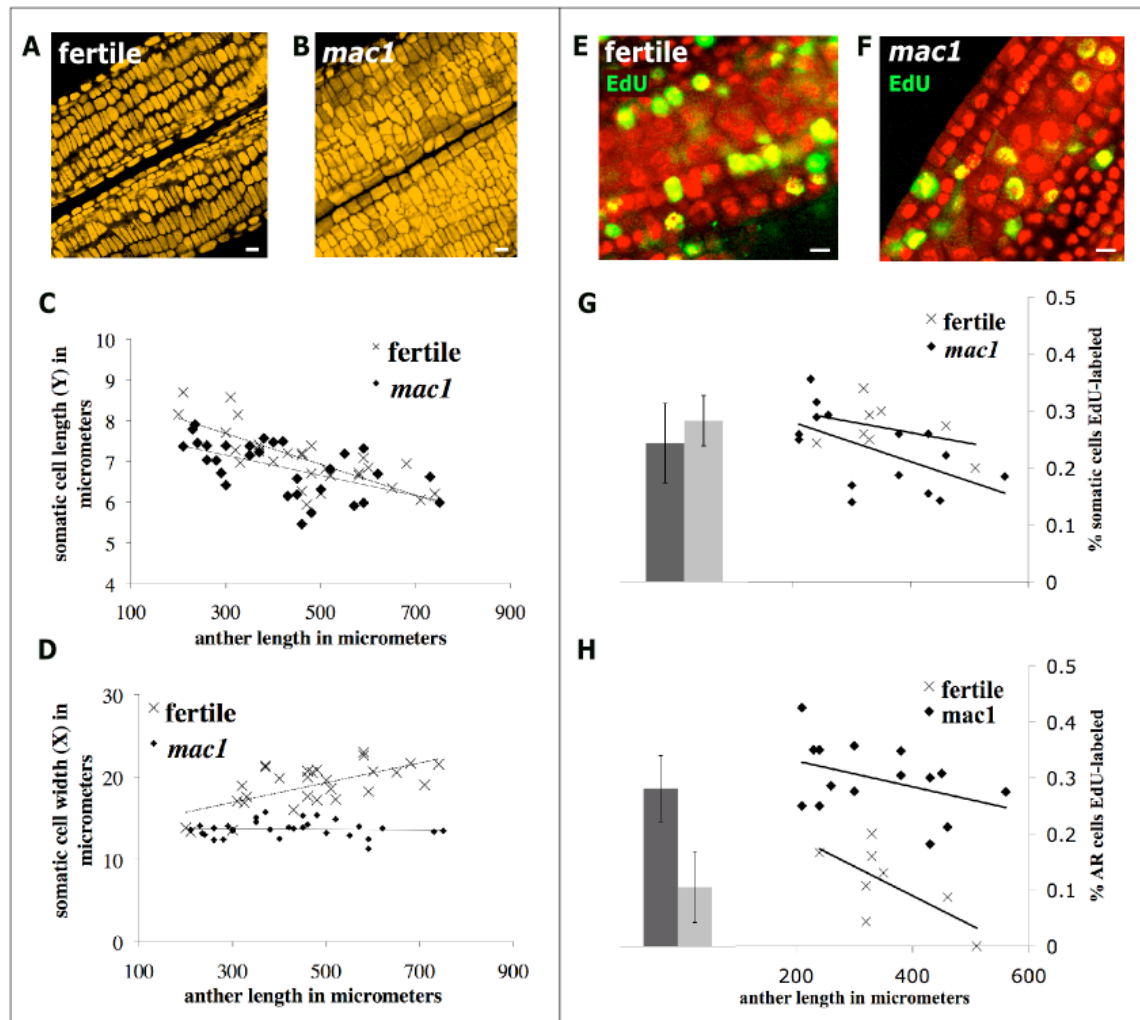

**Fig. S6**

MAC1 does not influence somatic proliferation rate as a whole, but rather directs the singular periclinal division of L2-d neighbors. Two *Arabidopsis* mutants are similar to *mac1*: the LRR receptor kinase EXS/EMS1 and its putative secreted ligand TPD1, a homolog of rice OsTDL1A (7, 30-33). These molecules are proposed to define a signaling module responsible for tapetal fate specification and/or proliferation (9). Unlike *mac1*, *tpd1* and *ems1* mutants typically form endothecium and secondary parietal layer but middle layer and tapetum specification is faulty (4, 11). In maize, does MAC1 promote differentiation and anticlinal proliferation of presumptive secondary parietal cells, as proposed for the role of TPD1 in tapetal development (9), or more specifically control the critical periclinal division?

Cell counts and measurements indicated that anticlinal proliferation of the faulty somatic layer is excessive in *mac1* compared to either the fertile endothecium or SPL, because the single layer *mac1* soma had a cell census similar to the sum of endothecium and secondary parietal layer in fertile. (A-B) Fertile endothecium illustrated normal cell numbers (A) and *mac1* subepidermal layers contained excessive cells (B). The

endothecial layer in fertile had ~12-14 very wide cells around the lobe at reproductive maturity (13). In *mac1* ~ 20 - 25 somatic cells occupied this circumference. (C, D) In addition, *mac1* somatic cells were smaller than either secondary parietal layer or endothecium reflecting increased anticlinal division to sustain anther growth. (C) Endothecium / subepidermal cell length (distance along longitudinal (Y) axis) was equivalent. (D) Somatic cell width (circumferential (X) axis) was smaller in *mac1*, as a result of excessive anticlinal divisions. Each point represents the average of least 50 cells in a single lobe. Eventually, a partial second layer formed in *mac1* around 700  $\mu\text{m}$ , five days late, but appeared dissimilar to the secondary parietal layer, middle layer, and tapetum. This is similar to aspects of TPD1 / EMS1 phenotypes in *Arabidopsis*, but in those mutants a full secondary parietal layer is present initially, while in *mac1* no secondary parietal layer was ever formed. Interestingly, the *exs* mutant in the C24 background has only a single somatic layer as is found in *mac1* (30).

Does mitotic rate of the somatic and germinal cells change in the *mac1* mutant? (E-F) 10  $\mu\text{M}$  EdU was injected into tassels during the phenocritical period, and 6 hours later 200-600  $\mu\text{m}$  anthers were stained (13). The EdU stain showed excessive staining in *mac1* archesporial cells, indicative of a faster mitotic rate. Red, propidium iodide; green, EdU. (G-H) Quantification of EdU staining in fertile and *mac1* somatic layer(s). Each dot represents a single lobe, from which all the cells were counted. EdU staining was even and distributed equivalently along the length of the lobe, because anthers lack an intercalary meristem. The bars represent averages of the lobes examined  $\pm$  s.d. (G) Combining the cell counts for the EN and SPL layers together for fertile, the percentage of somatic cells that were EdU positive is slightly greater than in *mac1* but the difference is not significant. (H) The percentage of EdU+ archesporial cells was significantly greater in *mac1* than in fertile (Student's T-test,  $p < 0.01$ ). Scale bar = 15  $\mu\text{m}$ .

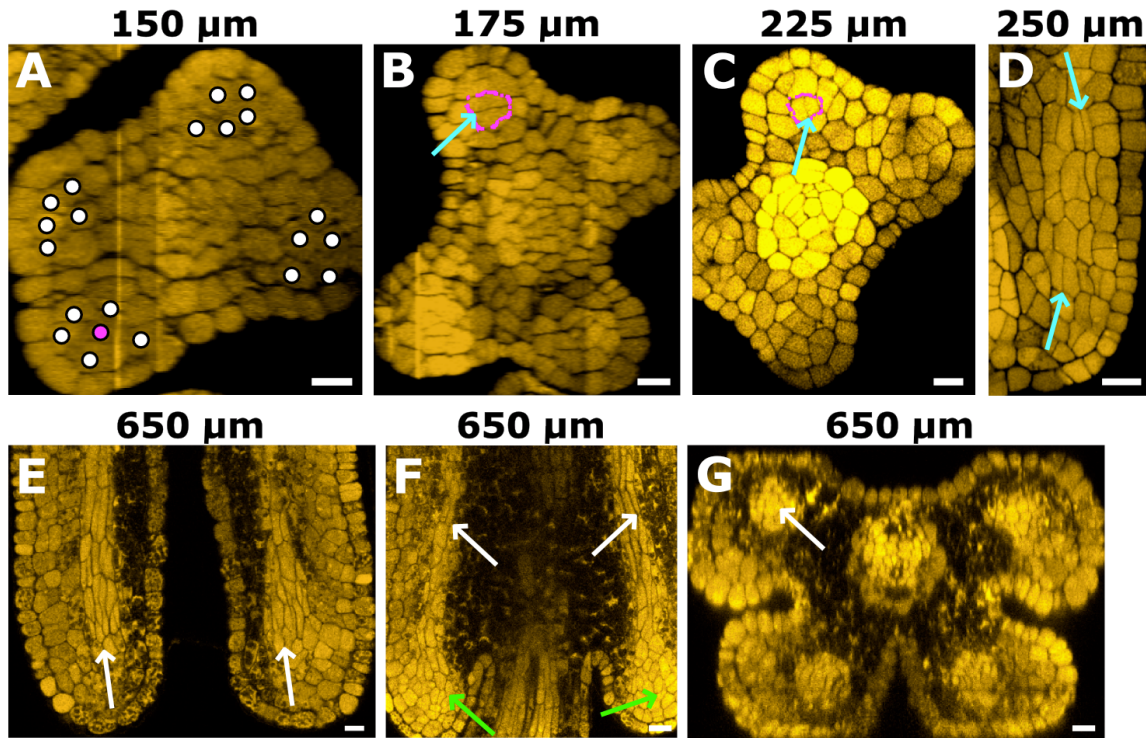

**Fig. S7**

Sterile *msca1* anthers failed to differentiate archesporial cells correctly and had none of the normal lobe cell types. Initially, anthers appeared normal (A), with white dots marking L2-d cells. At the same stage that archesporial cells enlarge in fertile, the *msca1* central presumptive archesporial cells (pink dot) failed to enlarge. (B-D) They instead continued to proliferate (blue arrows) making longitudinal divisions to create long, columnar cells that differentiated as vascular bundles. (D-G). These bundles (white arrows) did not connect with the central vasculature of the stamen, but instead terminated at the tips and base into a mass of parenchyma-like cells (green arrows) (F). Scale bar = 15  $\mu\text{m}$ .

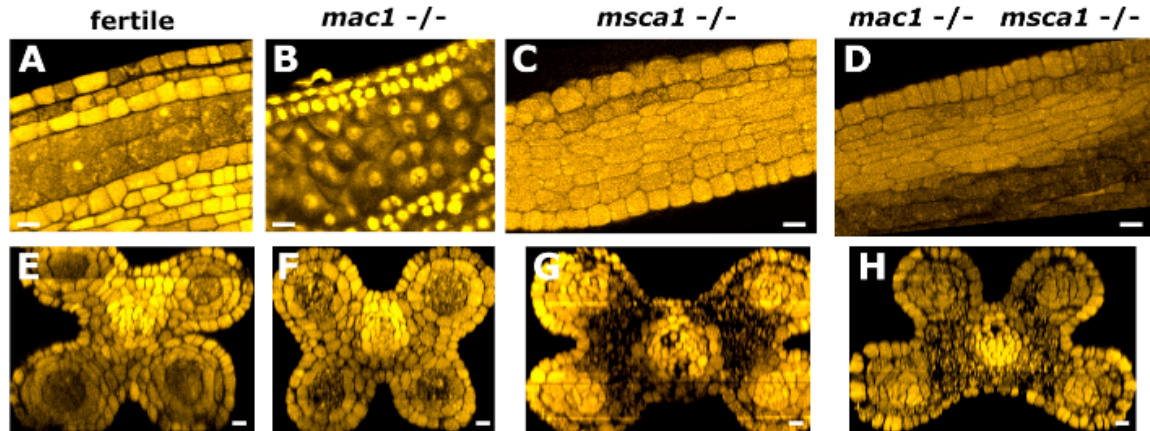

**Fig. S8**

*msca1* is epistatic to *mac1*. (A-D) Longitudinal images of single lobes. (E-H) Transverse Z-stack reconstructions showing the butterfly cross-section. (A,E) Fertile anther at 300  $\mu\text{m}$ . The lobe cell layers from the outside in are epidermis, endothecium, secondary parietal layer, and archesporial. (B,F) *mac1* anther with EPI, a faulty somatic layer with occasional periclinal division resulting in a one cell wide bilayer, and excess archesporial cells. The longitudinal image (B) is from a 600- $\mu\text{m}$  anther while the transverse reconstruction (F) is from a 280  $\mu\text{m}$  anther. (C,G) *msca1* anthers lack all normal internal cell types and instead lobes contain vascular bundles and parenchyma-like cells. (D,H) The double mutant looked just like *msca1*. Scale bar = 15  $\mu\text{m}$ .

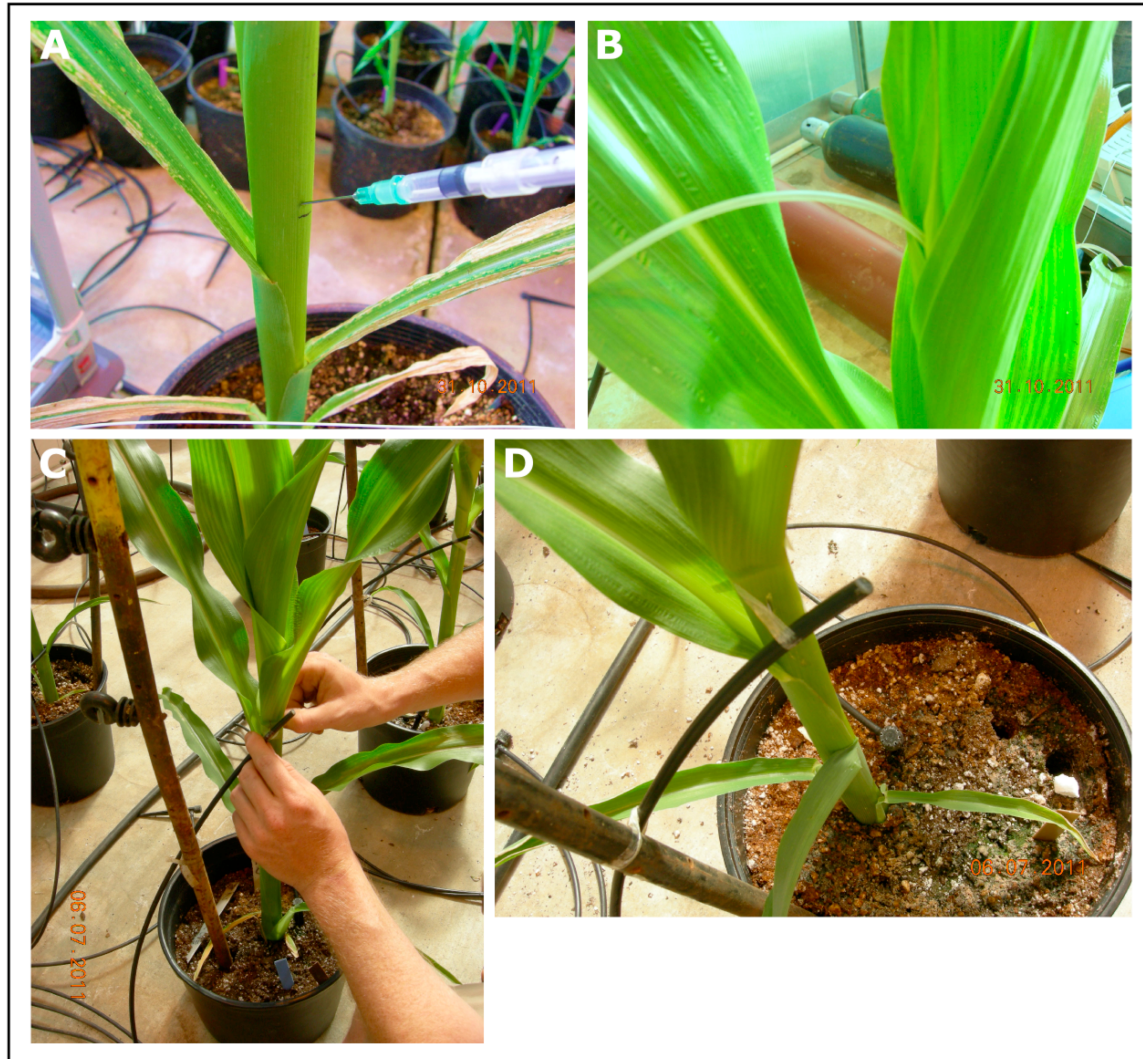

**Fig. S9**

To determine oxygen concentration, we inserted a needle-borne probe at several developmental stages. After measuring percent  $O_2$ , plants were opened to confirm needle position in the airspace and measure anther size. Measurements were  $\sim 1.4\%$  at the 2 cm tassel stage at the stage when archesporial specification occurs, and at 12 cm increments above the tassel they were 4%, 8%, 16% and finally 20%  $O_2$  near the top. Thus, there is an oxygen gradient in the whorl, with a hypoxic atmosphere surrounding the tassel. (A) Oxygen probe set up with needle inserted through the leaf whorl at the level of the tassel and positioned within the internal airspace. (B) Hose threaded down into leaf whorl for gas delivery avoiding the wounding response. (C, D) Gas delivery through a 26-gauge needle positioned directly into the airspace.

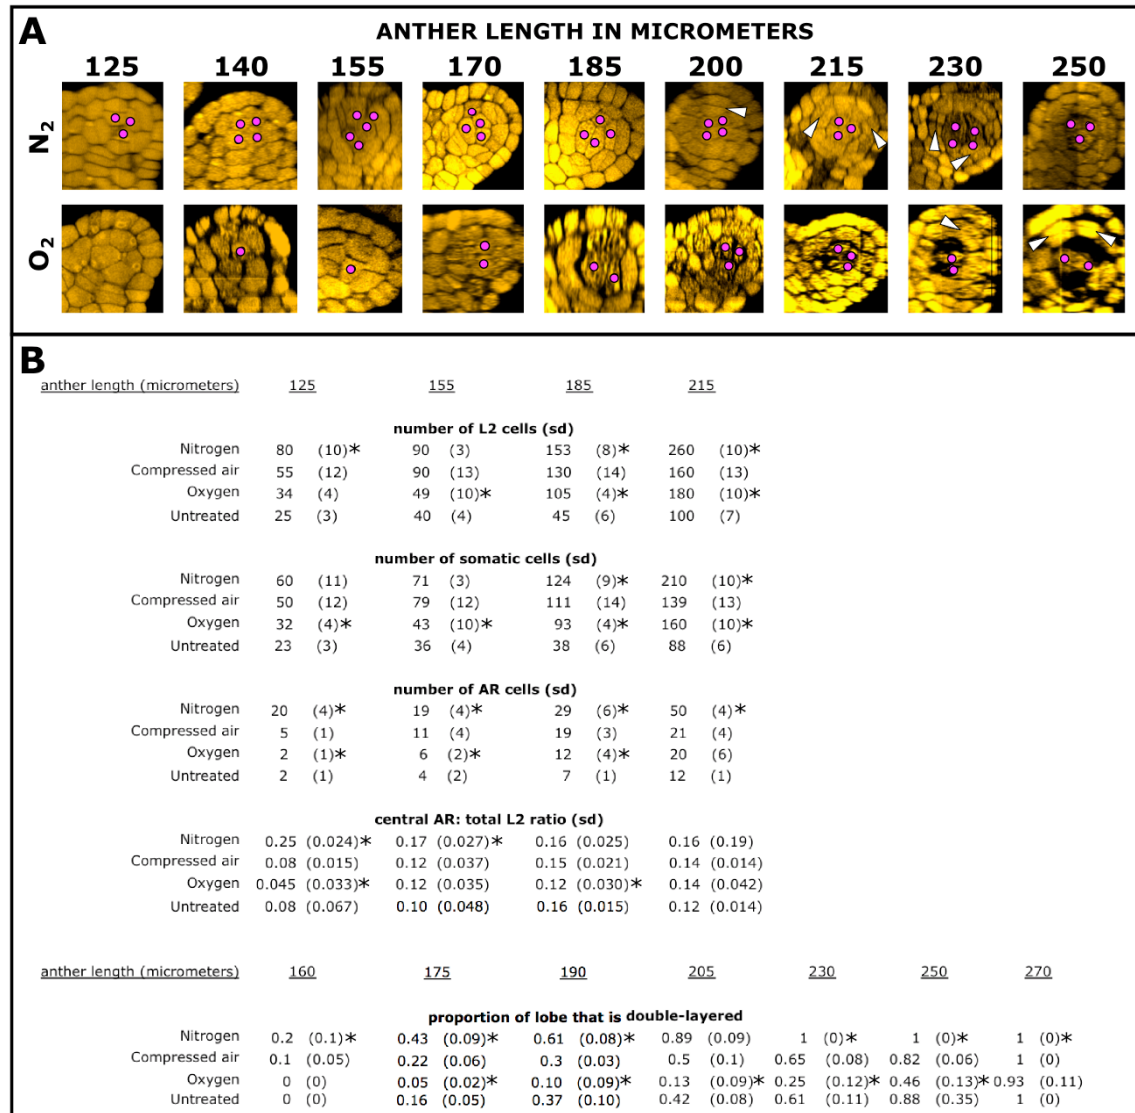

**Fig. S10**

Gas delivery via needle positioned directly into the airspace confirmed the phenotypes observed in the hose application. Compressed air (20% O<sub>2</sub>) application, a mild oxygenation treatment, controlled for wounding and/or desiccation effects. (A) Transverse reconstructions demonstrate precocious and excessive archesporial (AR) cell specification (pink dots) and early somatic bilayer formation (white arrows). Scale bar = 15  $\mu$ m. (B) (*top*) Compared to compressed air, N<sub>2</sub> promoted L2-d and somatic cell proliferation at three out of four size classes while O<sub>2</sub> decreased counts early. Excess presumptive archesporial (AR) cells are present in N<sub>2</sub>-treated lobes at all stages while O<sub>2</sub> had significantly fewer compared to compressed air at all but the largest size class. AR: total L2-d ratio was dramatically higher in N<sub>2</sub> and slightly lower in O<sub>2</sub> than compressed air at early size classes. (*bottom*) Quantification of the secondary parietal layer / endothecium formation confirms findings from the hose delivery protocol. Stars represent significance compared to control by Student's T-test ( $p < 0.01$ ).

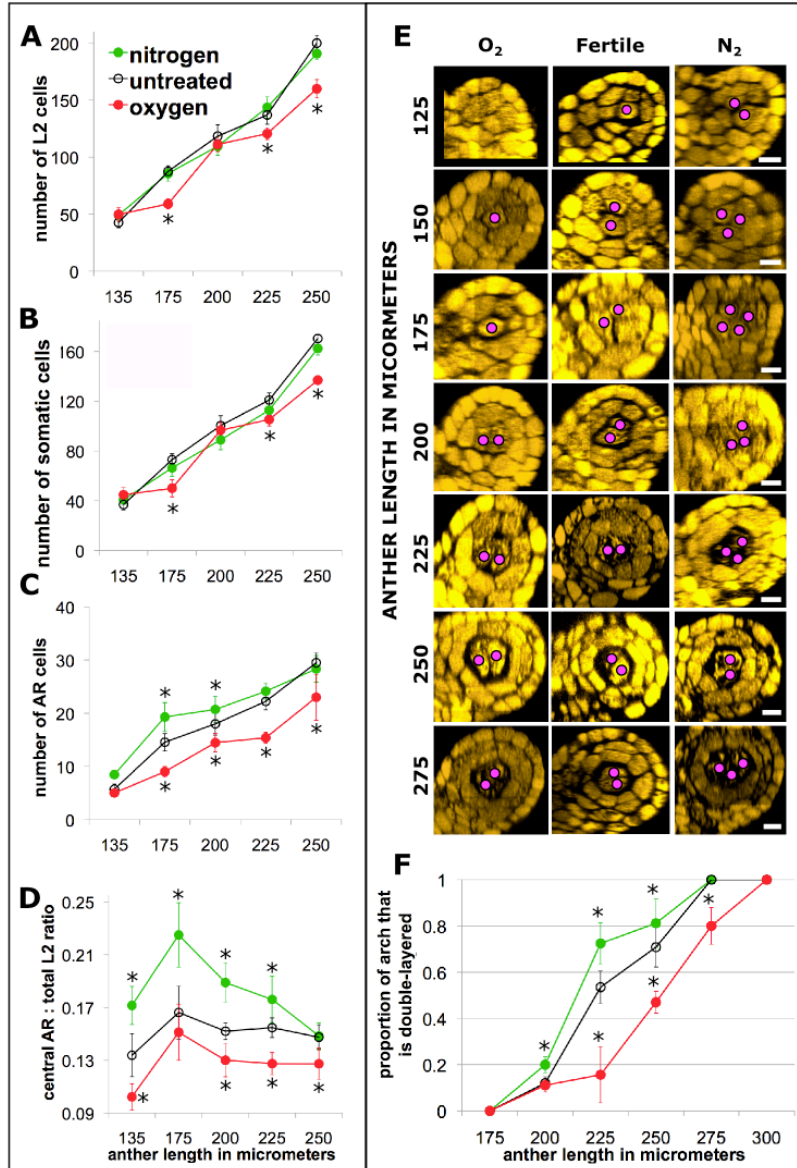

**Fig. S11**

24 hour hose application on A619 inbred recapitulated results, but with milder effects on cell proliferation. To confirm results from W23, these treatments were performed on the A619 inbred, which has double the archesporial (AR) cell count. Total L2 cell counts (**A**) and somatic cells (**B**) were significantly lower in O<sub>2</sub> treatment at three of the five size classes compared to both untreated fertile and N<sub>2</sub> treatment. (**C**) The total number of presumptive and differentiated AR cells was significantly elevated in two N<sub>2</sub> size classes, while O<sub>2</sub> treatment resulted in fewer AR in almost all size classes. (**D**) AR: total L2 ratios highlight differences in allocation of AR cells in gas treatments. (**E**) Transverse reconstructions showing untreated fertile (*center*), O<sub>2</sub> (*left*) and N<sub>2</sub> (*right*) treatment. Central AR cells denoted with pink dots. Scale bar = 15  $\mu$ m. (**F**) Bilayer progression was delayed in O<sub>2</sub> and slightly accelerated in N<sub>2</sub>. In all panels stars represent significance compared to control by Student's T-test ( $p < 0.01$ ). Error bars are  $\pm$  s.d. (N > 10).

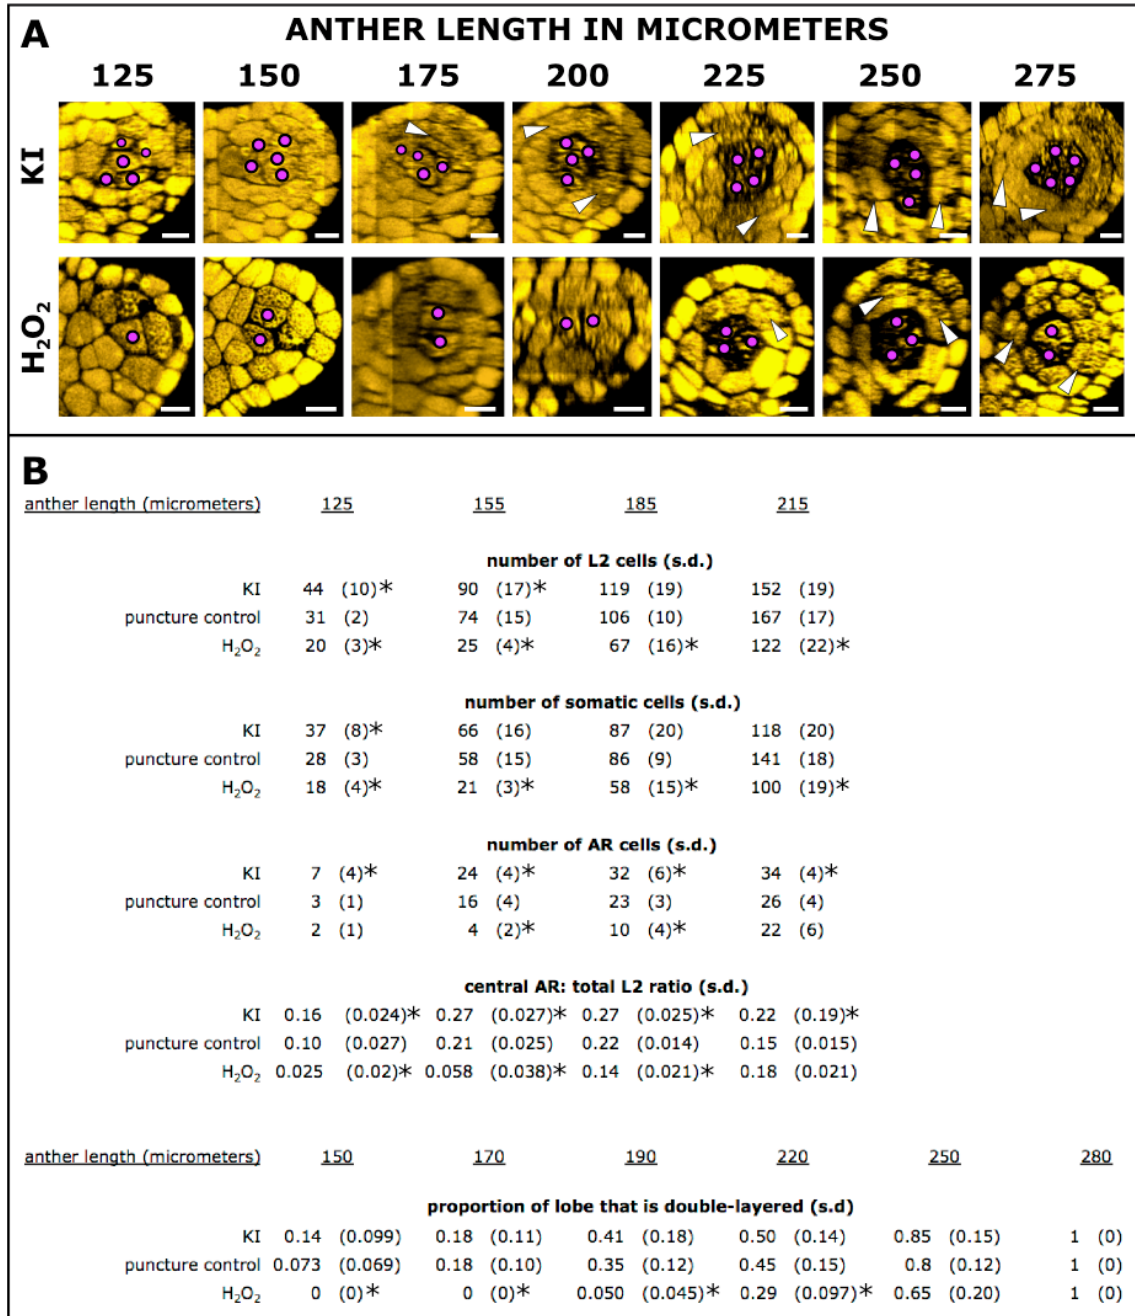

**Fig. S12**

1 mM H<sub>2</sub>O<sub>2</sub> inhibited and 10 mM KI promoted AR cell specification and somatic bilayer development after 48-hour treatments. (A) Transverse reconstructions of KI (top) and H<sub>2</sub>O<sub>2</sub> (bottom) treatment with excess AR cells (pink dots) early in KI and precocious bilayer development (white arrowheads). Scale bar = 15  $\mu$ m. (B) Table showing total L2, somatic, and central AR cell counts, AR: total L2 ratios, and the proportion of the lobe occupied by the somatic bilayer. (top) All treatments promoted cell proliferation of the early lobe compared to untreated, with KI being the most dramatic, H<sub>2</sub>O<sub>2</sub> the least. Setting mock injection (wounding via needle puncture) as the control, KI significantly

promoted the formation of AR cells at all four size categories while H<sub>2</sub>O<sub>2</sub> significantly inhibited their specification in two of the four. The central AR: total L2 ratio highlights the differences between treatments, with KI preferentially dedicating a higher proportion of cells to the AR population than puncture control and H<sub>2</sub>O<sub>2</sub> resulting in a lower proportion in 3 of the 4 size classes. (*bottom*) Bilayer development was slightly accelerated in KI and delayed in H<sub>2</sub>O<sub>2</sub>. Stars represent significance compared to control by Student's T-test ( $p < 0.01$ ).

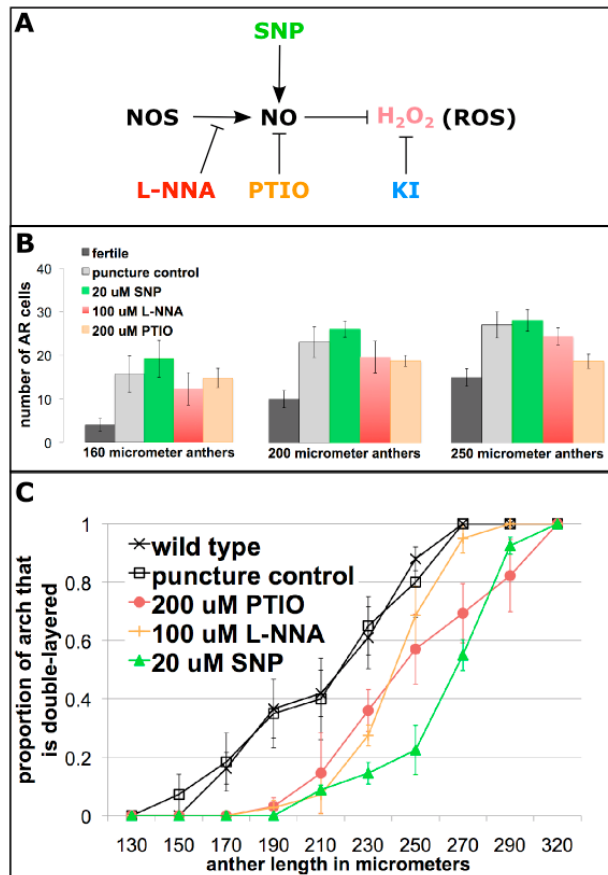

**Fig. S13**

Nitric oxide (NO) (ROS inhibitor) pushes cells towards an AR fate. (A) N<sup>G</sup>-nitro-L-Arginine (L-NNA) (NO synthase inhibitor), 2-Phenyl-4,4,5,5-tetramethylimidazoline-1-oxyl-3-oxide (PTIO) (NO scavenger), and sodium nitroprusside (SNP) (NO donor) were injected into the tassel airspace during the critical AR specification period 48 hours prior to anther dissection. NO suppresses methyl jasmonate-induced H<sub>2</sub>O<sub>2</sub> production (17) and reduces O<sub>2</sub> consumption (23). All three treatments slowed the morphological differentiation of central AR cells. Central cells were present but anthers did not achieve the normal somatic ring / central germinal cell organization until ~250 μm. (B) Central AR counts were slightly repressed in PTIO and L-NNA treatments, and slightly promoted in SNP at all three stages checked. (C) The progression of somatic bilayer formation was dramatically delayed in all three treatments compared to the puncture control and untreated plants, with SNP being the most delayed (green). Diphenylene iodonium (DPI) (inhibits NADPH oxidase and other flavin-containing enzymes) was also administered, but this treatment caused complete degeneration of the tassel tissues. Error bars are +/- s.d.

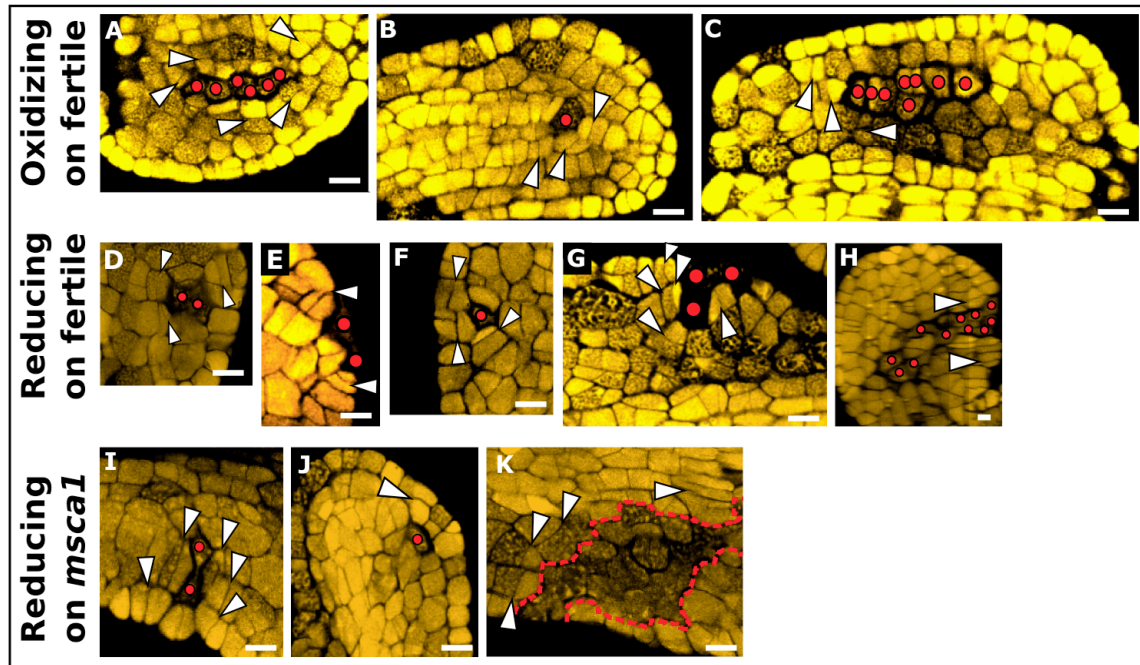

**Fig. S14**

Additional cases of ectopic archesporial (AR) cells in oxidizing (**A-C**) and reducing (**D-H**) treatments on fertile plants, and in reducing treatments (**I-K**) on *msca1* plants. All ectopic AR (red dots) in these examples stimulated oriented divisions in surrounding cells (white arrowheads). (**A**) Ectopic AR column after O<sub>2</sub> needle treatment in connective tissue. (**B**) Single ectopic AR cell in connective tissue after O<sub>2</sub> needle treatment. (**C**) Ectopic AR column in connective tissue after H<sub>2</sub>O<sub>2</sub> treatment. (**D**) Subepidermal ectopic AR accompanied by layer-adding divisions in epidermal and subepidermal neighbors after N<sub>2</sub> needle treatment. (**E**) Duet ectopic AR in epidermis after N<sub>2</sub> needle treatment. (**F**) Subepidermal AR after KI treatment stimulating oriented divisions in epidermal and subepidermal neighbors. (**G**) Three ectopic AR on the epidermis following N<sub>2</sub> needle treatment (**H**) Longitudinal image of ectopic AR cluster extending from epidermis to connective tissues following N<sub>2</sub> needle treatment. (**I**) SNP-treated *msca1* anthers with two ectopic AR. (**J**) KI-treated *msca1* with subepidermal ectopic AR and accompanying periclinal divisions in the epidermis. (**K**) Large cluster of ectopic AR in an SNP-treated *msca1* anther outlined by red dots. Scale bar = 20  $\mu$ m.

**Table S1.**

Pre-meiotic (1.0  $\mu$ m) archesporial (AR)-enriched transcripts in fertile and *mac1*. Laser microdissected AR cells from mutant and fertile sibling were compared on microarray in duplicate (dye swap). The expression of 297 genes found to be enriched in AR cells (12) (GEO # GS30149) at meiosis (1.5 mm stage) is reported. 96.7% of the time, the expression was found to be roughly equal between *mac1* and the fertile heterozygous sibling. 3.3% of transcripts were present and low in fertile but absent in *mac1*. Gene names correspond to the ID on the Agilent microarray. Data deposited in GEO (#XXXXX).

| (column 1) |             |             | (column 2) |             |             | (column 3) |             |             |
|------------|-------------|-------------|------------|-------------|-------------|------------|-------------|-------------|
| GeneName   | + / -<br>AR | - / -<br>AR | GeneName   | + / -<br>AR | - / -<br>AR | GeneName   | + / -<br>AR | - / -<br>AR |
| TC306331   | 1080        | 265         | TC309875   | 219         | 108         | DR813132   | 0           | 0           |
| AI944295   | 34          | 51          | DN586214   | 34          | 62          | TC289774   | 124         | 190         |
| TC311757   | 111         | 184         | TC283905   | 0           | 0           | TC293138   | 71          | 68          |
| TC313596   | 49          | 163         | TC309993   | 651         | 519         | TC295272   | 347         | 335         |
| TC313657   | 64          | 70          | TC314530   | 0           | 0           | TC301356   | 1253        | 737         |
| TC305266   | 2383        | 980         | TC281589   | 80          | 53          | DT943054   | 84          | 67          |
| TC308593   | 55          | 47          | TC298798   | 1295        | 612         | DT943053   | 207         | 81          |
| TC287318   | 53          | 53          | TC282924   | 302         | 183         | TC305979   | 247         | 148         |
| TC301402   | 501         | 220         | CF059625   | 1029        | 64          | TC302216   | 52          | 57          |
| TC294630   | 59          | 138         | TC304331   | 0           | 0           | TC284771   | 466         | 362         |
| TC308047   | 175         | 150         | TC287674   | 76          | 63          | TC303615   | 72          | 63          |
| CO533393   | 60          | 54          | TC293448   | 326         | 596         | TC311135   | 354         | 137         |
| TC289712   | 898         | 509         | TC283790   | 0           | 0           | TC309440   | 50          | 55          |
| BQ163730   | 798         | 757         | TC312974   | 71          | 78          | TC289387   | 215         | 145         |
| CN844996   | 0           | 0           | CF019406   | 156         | 183         | TC281453   | 727         | 408         |
| TC279560   | 100         | 72          | TC280500   | 126         | 135         | TC286486   | 124         | 61          |
| TC296845   | 273         | 130         | CD447985   | 101         | 287         | TC288800   | 314         | 151         |
| TC289757   | 0           | 0           | CF626131   | 31          | 82          | TC297030   | 0           | 0           |
| TC281079   | 397         | 229         | TC313491   | 415         | 329         | TC303749   | 0           | 0           |
| TC284042   | 215         | 336         | TC292774   | 11472       | 8276        | TC282058   | 233         | 348         |
| TC310354   | 2602        | 1752        | TC314580   | 77          | 0           | TC302617   | 132         | 63          |
| TC283445   | 527         | 425         | TC283173   | 47          | 44          | TC299289   | 57          | 47          |
| TC279480   | 171         | 265         | TC298797   | 333         | 153         | TC297564   | 70          | 84          |
| TC296658   | 59          | 48          | DR906542   | 81          | 94          | TC293567   | 3226        | 2147        |
| TC309174   | 74          | 61          | TC283852   | 140         | 178         | TC280737   | 41          | 93          |
| TC284552   | 83          | 64          | TC305717   | 0           | 0           | TC280740   | 43          | 52          |
| TC302598   | 95          | 52          | TC309747   | 304         | 136         | CK787298   | 0           | 0           |
| TC282176   | 394         | 227         | TC301790   | 158         | 114         | TC308668   | 58          | 57          |
| CF633046   | 77          | 59          | TC285165   | 273         | 115         | TC298179   | 92          | 67          |
| TC308051   | 40          | 51          | TC311526   | 2093        | 2001        | DT943270   | 0           | 0           |
| TC284526   | 0           | 0           | TC306072   | 772         | 367         | TC314427   | 76          | 57          |
| TC284637   | 634         | 260         | TC293449   | 44          | 50          | TC289341   | 292         | 331         |
| TC314658   | 162         | 85          | TC283691   | 960         | 487         | TC285412   | 76          | 60          |
| TC289172   | 408         | 460         | TC305158   | 324         | 328         | TC295182   | 178         | 100         |
| TC312972   | 102         | 94          | DR829208   | 56          | 49          | TC304232   | 48          | 46          |
| TC313076   | 45          | 59          | TC310683   | 0           | 0           | TC314544   | 2161        | 876         |
| TC284770   | 52          | 76          | DT647788   | 60          | 60          | DT946613   | 159         | 81          |
| TC306070   | 95          | 90          | TC306026   | 127         | 78          | TC307673   | 447         | 407         |
| TC303407   | 0           | 0           | AW231811   | 46          | 45          | TC312497   | 0           | 0           |

|          |      |      |          |      |      |          |       |      |
|----------|------|------|----------|------|------|----------|-------|------|
| TC295047 | 646  | 447  | TC289354 | 138  | 160  | TC293566 | 2214  | 1700 |
| TC289727 | 54   | 47   | TC294269 | 60   | 50   | TC295697 | 42    | 48   |
| TC307255 | 714  | 355  | TC308574 | 0    | 0    | TC283769 | 0     | 0    |
| TC296050 | 74   | 61   | CD995221 | 94   | 83   | TC290945 | 47    | 48   |
| TC279580 | 166  | 164  | TC315488 | 59   | 53   | TC312299 | 70    | 53   |
| TC310105 | 56   | 0    | TC314126 | 0    | 0    | TC306976 | 369   | 261  |
| TC312091 | 94   | 68   | TC283431 | 43   | 124  | DR830496 | 0     | 0    |
| CX725290 | 161  | 72   | TC310688 | 652  | 493  | TC284316 | 53    | 0    |
| TC292021 | 262  | 104  | TC296255 | 54   | 71   | TC291853 | 67    | 57   |
| TC283684 | 126  | 75   | TC307982 | 60   | 301  | TC293263 | 1005  | 1568 |
| TC295259 | 60   | 48   | DR795221 | 521  | 345  | TC301331 | 226   | 187  |
| TC301446 | 376  | 218  | TC314676 | 220  | 185  | TC282918 | 192   | 128  |
| BG837957 | 0    | 0    | TC289753 | 0    | 0    | CO440202 | 74    | 57   |
| TC313569 | 102  | 57   | TC307556 | 85   | 69   | TC299943 | 1544  | 493  |
| TC305399 | 106  | 188  | TC305157 | 113  | 73   | TC280985 | 428   | 179  |
| DT943243 | 0    | 0    | TC288590 | 58   | 0    | TC302095 | 1306  | 1327 |
| TC315034 | 86   | 68   | TC287319 | 3141 | 4312 | TC284035 | 57    | 53   |
| TC287642 | 202  | 133  | TC284111 | 760  | 824  | TC297465 | 792   | 322  |
| BM340065 | 0    | 0    | TC291009 | 372  | 283  | TC310988 | 113   | 50   |
| TC314450 | 40   | 88   | TC307363 | 287  | 107  | TC309808 | 59    | 88   |
| TC295884 | 0    | 0    | TC295705 | 176  | 236  | CF040072 | 192   | 77   |
| TC301395 | 1043 | 471  | TC296253 | 0    | 0    | TC298200 | 137   | 72   |
| TC295868 | 98   | 140  | TC284639 | 111  | 203  | TC311848 | 2245  | 3166 |
| TC295891 | 0    | 0    | TC290471 | 2035 | 1337 | TC313084 | 811   | 251  |
| TC302888 | 120  | 94   | TC284496 | 69   | 82   | DT647408 | 102   | 57   |
| TC307873 | 145  | 287  | TC285351 | 117  | 88   | TC307549 | 179   | 103  |
| TC303479 | 58   | 0    | TC288463 | 52   | 47   | CF629011 | 93    | 171  |
| TC302844 | 0    | 0    | TC295239 | 376  | 149  | TC292387 | 336   | 225  |
| TC284163 | 371  | 292  | TC306328 | 60   | 51   | TC286746 | 915   | 869  |
| TC308672 | 0    | 0    | CO526721 | 50   | 46   | TC282507 | 505   | 558  |
| TC284146 | 141  | 67   | DT652253 | 94   | 61   | CD436448 | 91    | 52   |
| TC289458 | 598  | 288  | TC306547 | 705  | 355  | TC295587 | 133   | 63   |
| TC313835 | 140  | 187  | TC287826 | 54   | 46   | TC286055 | 547   | 331  |
| TC279806 | 3854 | 4642 | TC297071 | 60   | 70   | TC285655 | 23238 | 7973 |
| CD995946 | 0    | 0    | AI692111 | 388  | 122  | TC314264 | 184   | 115  |
| TC310318 | 98   | 0    | TC302041 | 57   | 79   | TC293287 | 188   | 169  |
| CB280793 | 1780 | 353  | BG319836 | 208  | 229  | TC282818 | 472   | 250  |
| TC287858 | 0    | 0    | TC290304 | 81   | 53   | TC308341 | 58    | 0    |
| TC289461 | 213  | 55   | TC312257 | 134  | 56   | TC279890 | 1394  | 1004 |
| BM378145 | 388  | 98   | TC287864 | 183  | 115  | TC304579 | 560   | 598  |
| TC279550 | 2384 | 600  | TC304530 | 80   | 94   | TC301734 | 80    | 46   |
| TC311769 | 54   | 48   | CD573220 | 55   | 0    | TC301530 | 196   | 85   |
| TC310843 | 404  | 440  | TC313810 | 0    | 0    | TC280797 | 548   | 179  |
| BM259506 | 55   | 92   | TC309689 | 51   | 52   | TC313063 | 193   | 160  |
| TC310187 | 6916 | 2444 | TC291467 | 187  | 115  | CO441573 | 408   | 616  |
| TC296799 | 81   | 69   | TC286409 | 176  | 138  | TC297993 | 160   | 134  |
| TC300972 | 53   | 59   | TC298303 | 1230 | 404  | TC283544 | 83    | 64   |
| TC295938 | 53   | 46   | TC279657 | 0    | 0    | DN559761 | 215   | 146  |
| CF635716 | 0    | 0    | DT650280 | 83   | 110  | TC280195 | 589   | 526  |
| TC307997 | 332  | 209  | TC292121 | 4238 | 3468 | TC284424 | 1327  | 444  |
| TC315563 | 65   | 59   | TC283041 | 57   | 0    | CA827264 | 110   | 0    |
| DT643307 | 143  | 162  | TC295193 | 59   | 0    | TC293183 | 386   | 213  |
| CB278279 | 134  | 82   | TC297828 | 0    | 0    | TC296831 | 546   | 314  |
| TC300898 | 68   | 50   | TC294408 | 130  | 64   | TC294651 | 92    | 77   |

|          |     |     |          |     |     |          |     |     |
|----------|-----|-----|----------|-----|-----|----------|-----|-----|
| DT645987 | 78  | 79  | TC294126 | 92  | 64  | TC304557 | 81  | 56  |
| TC294308 | 58  | 63  | TC302695 | 0   | 0   | TC283469 | 186 | 120 |
| TC287640 | 360 | 583 | AM1      | 77  | 80  | TC310367 | 116 | 92  |
| BM500607 | 0   | 0   | TC283097 | 696 | 430 | BG841754 | 143 | 136 |
| BG319898 | 0   | 0   | TC292342 | 238 | 280 | TC306103 | 0   | 0   |
| TC315043 | 136 | 130 | TC311214 | 86  | 132 | TC307437 | 96  | 84  |

**Table S2.**

Ectopic archesporial (AR) formation in reducing treatments that increase hypoxia and/or lower H<sub>2</sub>O<sub>2</sub>. Ectopic AR cells were defined by their morphological similarity to normal AR cells combined with non-locular location. The first two rows give the treatment type and genotype, and the next two rows give the general effects of the treatments on AR counts and bilayer progression. The next two rows give the frequency of observing AR in each treatment / genotype combination. By far the protocol that caused the highest frequency of ectopic AR was the SNP treatment on the *msc1* mutant (37% of anthers had AR). KI on *msc1* (9.5%) and SNP + N<sub>2</sub> on fertile (16.2%) treatments also resulted in a high frequency of ectopic AR. Exogenous N<sub>2</sub> application with the hose protocol did not cause ectopic AR in any anthers; this is a gentler treatment than the direct application of gas through the needle. Next the ectopic AR location was tallied as being either superficial (near or on the epidermis (EPI)) or internal (near or in the connective (CT) and vasculature). In reducing treatments ectopic archesporial cell location was biased for peripheral tissues. Finally, the characteristics of the ectopic archesporial cells are given in the final two rows, including the presence of periclinal divisions generating an endothecium (EN) / secondary parietal layer (SPL) -like bilayer surrounding the AR cells (which were absent in all *mac1* ectopic AR) and the average count of AR cells in each instance.

[illegible]

**Table S3.**

Ectopic archesporial cell formation in oxidizing treatments that increase oxygen and/or H<sub>2</sub>O<sub>2</sub>. Ectopic archesporial cell location in oxidizing treatments was highly biased for the internal tissues. The organization of the table is the same as in table S2.

| AR per event | niche - forming | CHARACTERISTICS |  | by CT    | by EPI  | LOCATION |  | # having ectopic AR | total anthers | COUNT |  | SPL/EN timing | AR count | TREATMENT EFFECTS |  | GENOTYPE     | TREATMENTS (OXIDIZING)        |
|--------------|-----------------|-----------------|--|----------|---------|----------|--|---------------------|---------------|-------|--|---------------|----------|-------------------|--|--------------|-------------------------------|
|              |                 |                 |  |          |         |          |  |                     |               |       |  |               |          |                   |  |              |                               |
| 3.7          | ~half           |                 |  | 12       | 6       |          |  | 18                  | 192           |       |  | delayed       | extra    |                   |  | fertile      | O <sub>2</sub> (direct)       |
| N/A          | N/A             |                 |  | 0        | 0       |          |  | 0                   | 190           |       |  | late          | fewer    |                   |  | fertile      | O <sub>2</sub> (hose)         |
| 2            | yes             |                 |  | 1        | 2       |          |  | 3                   | 55            |       |  | same          | same     |                   |  | fertile      | Air (direct)                  |
| N/A          | N/A             |                 |  | 0        | 0       |          |  | 0                   | 60            |       |  | same          | extra    |                   |  | fertile      | Puncture                      |
| N/A          | N/A             |                 |  | 0        | 0       |          |  | 0                   | 120           |       |  | delayed       | fewer    |                   |  | fertile      | H <sub>2</sub> O <sub>2</sub> |
| 5            | yes             |                 |  | 3        | 1       |          |  | 4                   | 37            |       |  | delayed       | fewer    |                   |  | fertile      | PTIO                          |
| 2            | yes             |                 |  | 1        | 0       |          |  | 1                   | 23            |       |  | delayed       | fewer    |                   |  | fertile      | L-NNA                         |
| 1.5          | yes             |                 |  | 2        | 0       |          |  | 2                   | 30            |       |  | delayed       | normal   |                   |  | fertile      | N <sub>2</sub> , PTIO         |
| N/A          | N/A             |                 |  | 0        | 0       |          |  | 0                   | 30            |       |  | delayed       | normal   |                   |  | fertile      | N <sub>2</sub> , L-NNA        |
| N/A          | N/A             |                 |  | 0        | 0       |          |  | 0                   | 40            |       |  | N/A           | extra    |                   |  | <i>mac1</i>  | O <sub>2</sub> (direct)       |
| N/A          | N/A             |                 |  | 0        | 0       |          |  | 0                   | 18            |       |  | N/A           | extra    |                   |  | <i>mac1</i>  | H <sub>2</sub> O <sub>2</sub> |
| N/A          | N/A             |                 |  | 0        | 0       |          |  | 0                   | 12            |       |  | N/A           | extra    |                   |  | <i>mac1</i>  | PTIO                          |
| N/A          | N/A             |                 |  | 0        | 0       |          |  | 0                   | 11            |       |  | N/A           | extra    |                   |  | <i>mac1</i>  | L-NNA                         |
| N/A          | N/A             |                 |  | 0        | 0       |          |  | 0                   | 29            |       |  | N/A           | none     |                   |  | <i>msca1</i> | O <sub>2</sub> (direct)       |
| N/A          | N/A             |                 |  | 0        | 0       |          |  | 0                   | 21            |       |  | N/A           | N/A      |                   |  | <i>msca1</i> | H <sub>2</sub> O <sub>2</sub> |
| N/A          | N/A             |                 |  | 0        | 0       |          |  | 0                   | 12            |       |  | N/A           | N/A      |                   |  | <i>msca1</i> | PTIO                          |
| N/A          | N/A             |                 |  | 0        | 0       |          |  | 0                   | 9             |       |  | N/A           | N/A      |                   |  | <i>msca1</i> | L-NNA                         |
| Avg = 4.2    |                 |                 |  | 19 (70%) | 8 (30%) |          |  | 27 (3.0%)           | 889           |       |  |               |          |                   |  |              | TOTAL                         |

**Table S4.**

A subset of premeiotic (600-700  $\mu\text{m}$ ) archesporial (AR)-enriched transcripts. Laser-microdissected AR cells were compared in duplicate (dye swap) to whole anthers (WA) from the same tassel at the same stage. Genes that were expressed two-fold higher in AR versus WA have a  $\log_2$  ratio  $> 0.58$  ( $p < 0.05$ ). Some genes just below the cutoff are listed because of their importance to either alternative metabolism or ROS handling. Data deposited in GEO (#XXXXX).

| Protein_Match_ID | annotation / description                                        | log2<br>AR/WA | p-value  | AR<br>intensity | WA<br>intensity |
|------------------|-----------------------------------------------------------------|---------------|----------|-----------------|-----------------|
| GRMZM2G020801    | aconitate hydratase                                             | 2.36          | 5.50E-07 | 2344            | 451.4           |
| GRMZM2G176307    | cytosolic glyceraldehyde-3-phosphate dehydrogenase              | 2.34          | 3.66E-11 | 515             | 104.8           |
| GRMZM5G894515    | NAD(P)H-quinone oxidoreductase subunit 5, chloroplast precursor | 2.26          | 3.10E-08 | 1604            | 309.8           |
| GRMZM2G060079    | oxidoreductase, 2OG-Fe oxygenase family protein                 | 2.10          | 1.83E-12 | 235.7           | 57.5            |
| GRMZM2G368799    | inositol hexaphosphate kinase (NADH metabolism)                 | 2.09          | 7.26E-14 | 2210.8          | 517             |
| GRMZM2G415579    | NAD(P)H-dependent oxidoreductase                                | 1.75          | 8.85E-13 | 419.7           | 129.5           |
| GRMZM2G473001    | Phosphoenolpyruvate carboxylase 2 (PEPCase 2)(PEPC)             | 1.71          | 2.42E-12 | 306.2           | 91.2            |
| GRMZM2G383088    | plastidic 2-oxoglutarate/malate transporter                     | 1.61          | 1.12E-12 | 1640.7          | 586.1           |
| GRMZM5G866223    | NAD(P)H-quinone oxidoreductase subunit I, chloroplast precursor | 1.51          | 2.91E-08 | 13249.2         | 5437.1          |
| GRMZM5G800096    | NAD(P)H-quinone oxidoreductase chain 4, chloroplast precursor   | 1.39          | 1.13E-07 | 2048.7          | 638.5           |
| GRMZM2G096753    | phosphoenolpyruvate carboxylase kinase 3 (PEPCK)                | 1.37          | 8.90E-02 | 1308.5          | 1048.7          |
| GRMZM2G120857    | 3-isopropylmalate dehydrogenase                                 | 1.14          | 1.07E-07 | 646.8           | 290.2           |
| GRMZM5G800980    | NAD(P)H-quinone oxidoreductase subunit K, chloroplast precursor | 1.00          | 1.60E-03 | 2127.4          | 1081.6          |
| GRMZM2G113216    | thiol oxidoreductase                                            | 0.92          | 1.64E-08 | 192.4           | 97.4            |
| GRMZM2G076524    | succinate dehydrogenase                                         | 0.90          | 1.35E-09 | 1807.7          | 1129            |
| GRMZM2G004847    | glutaredoxin subgroup I; Grx_C3                                 | 0.82          | 6.70E-07 | 129.5           | 86              |
| GRMZM2G018251    | WW domain-containing oxidoreductase (alcohol dehydrogenase)     | 0.74          | 8.60E-05 | 898.1           | 430.3           |
| GRMZM2G073351    | NADPH protochlorophyllide oxidoreductase                        | 0.69          | 1.34E-06 | 99.9            | 65.2            |
| GRMZM2G329144    | glutathione peroxidase                                          | 0.62          | 2.20E-04 | 1149.1          | 706.8           |
| GRMZM2G051355    | alcohol dehydrogenase                                           | 0.58          | 5.08E-06 | 90.9            | 58.8            |
| GRMZM2G085019    | NADP-dependent malic enzyme, chloroplastic precursor            | 0.57          | 1.50E-03 | 545.1           | 466.7           |
| GRMZM2G107597    | cytochrome c oxidoreductase                                     | 0.57          | 3.50E-05 | 117.2           | 70.7            |

## References

1. C. G. Extavour, M. Akam, Mechanisms of germ cell specification across the metazoans: Epigenesis and preformation. *Development* **130**, 5869 (2003). [doi:10.1242/dev.00804](https://doi.org/10.1242/dev.00804) [Medline](#)
2. C. Juliano, G. Wessel, Developmental biology. Versatile germline genes. *Science* **329**, 640 (2010). [doi:10.1126/science.1194037](https://doi.org/10.1126/science.1194037) [Medline](#)
3. C. L. Hord, H. Ma, Genetic control of anther cell division and differentiation. *Plant Cell Monogr* **9**, 361 (2008). [doi:10.1007/7089\\_2007\\_136](https://doi.org/10.1007/7089_2007_136)
4. P. A. Bedinger, J. E. Fowler, in *Handbook of Maize: Its Biology*, J. L. Bennetzen, S. C. Hake, Eds. (Springer, New York, 2009), pp. 57–77.
5. R. B. Goldberg, T. P. Beals, P. M. Sanders, Anther development: Basic principles and practical applications. *Plant Cell* **5**, 1217 (1993). [Medline](#)
6. L. C. Boavida, J. D. Becker, J. A. Feijó, The making of gametes in higher plants. *Int. J. Dev. Biol.* **49**, 595 (2005). [doi:10.1387/ijdb.052019lb](https://doi.org/10.1387/ijdb.052019lb) [Medline](#)
7. R. C.-J. Wang *et al.*, *Development* **139**, 2594 (2012).
8. W. F. Sheridan, E. A. Golubeva, L. I. Abrahmova, I. N. Golubovskaya, The *mac1* mutation alters the developmental fate of the hypodermal cells and their cellular progeny in the maize anther. *Genetics* **153**, 933 (1999). [Medline](#)
9. X. Feng, H. G. Dickinson, Tapetal cell fate, lineage and proliferation in the *Arabidopsis* anther. *Dev* **137**, 2409 (2010). [doi:10.1242/dev.049320](https://doi.org/10.1242/dev.049320)
10. C. Albrecht, E. Russinova, V. Hecht, E. Baaijens, S. de Vries, The *Arabidopsis thaliana* SOMATIC EMBRYOGENESIS RECEPTOR-LIKE KINASES1 and 2 control male sporogenesis. *Plant Cell* **17**, 3337 (2005). [doi:10.1105/tpc.105.036814](https://doi.org/10.1105/tpc.105.036814) [Medline](#)
11. X. Feng, H. G. Dickinson, Packaging the male germline in plants. *Trends Genet.* **23**, 503 (2007). [doi:10.1016/j.tig.2007.08.005](https://doi.org/10.1016/j.tig.2007.08.005) [Medline](#)
12. G.-L. Nan *et al.*, Global transcriptome analysis of two ameiotic1 alleles in maize anthers: Defining steps in meiotic entry and progression through prophase I. *BMC Plant Biol.* **11**, 120 (2011). [doi:10.1186/1471-2229-11-120](https://doi.org/10.1186/1471-2229-11-120) [Medline](#)
13. T. Kelliher, V. Walbot, Emergence and patterning of the five cell types of the *Zea mays* anther locule. *Dev. Biol.* **350**, 32 (2011). [doi:10.1016/j.ydbio.2010.11.005](https://doi.org/10.1016/j.ydbio.2010.11.005) [Medline](#)
14. J. L. Leatherman, S. Dinardo, Germline self-renewal requires cyst stem cells and stat regulates niche adhesion in *Drosophila* testes. *Nat. Cell Biol.* **12**, 806 (2010). [doi:10.1038/ncb2086](https://doi.org/10.1038/ncb2086) [Medline](#)
15. M. C. Albertson *et al.*, U.S. patent 7915478 (2011).
16. H. Tsukagoshi, W. Busch, P. N. Benfey, Transcriptional regulation of ROS controls transition from proliferation to differentiation in the root. *Cell* **143**, 606 (2010). [doi:10.1016/j.cell.2010.10.020](https://doi.org/10.1016/j.cell.2010.10.020) [Medline](#)

17. J. W. Wang, J. Y. Wu, Nitric oxide is involved in methyl jasmonate-induced defense responses and secondary metabolism activities of *Taxus* cells. *Plant Cell Physiol.* **46**, 923 (2005). [doi:10.1093/pcp/pci098](https://doi.org/10.1093/pcp/pci098) [Medline](#)
18. G. Bertoni, CBS domain proteins regulate redox homeostasis. *Plant Cell* **23**, 3562 (2011). [doi:10.1105/tpc.111.231011](https://doi.org/10.1105/tpc.111.231011) [Medline](#)
19. S. Li *et al.*, Nuclear activity of ROXY1, a glutaredoxin interacting with TGA factors, is required for petal development in *Arabidopsis thaliana*. *Plant Cell* **21**, 429 (2009). [doi:10.1105/tpc.108.064477](https://doi.org/10.1105/tpc.108.064477) [Medline](#)
20. J. Murmu *et al.*, Arabidopsis basic leucine-zipper transcription factors TGA9 and TGA10 interact with floral glutaredoxins ROXY1 and ROXY2 and are redundantly required for anther development. *Plant Physiol.* **154**, 1492 (2010). [doi:10.1104/pp.110.159111](https://doi.org/10.1104/pp.110.159111) [Medline](#)
21. L. Hong *et al.*, Somatic and reproductive cell development in rice anther is regulated by a putative glutaredoxin. *Plant Cell* **24**, 577 (2012). [doi:10.1105/tpc.111.093740](https://doi.org/10.1105/tpc.111.093740) [Medline](#)
22. Q. Chen, E. J. Vazquez, S. Moghaddas, C. L. Hoppel, E. J. Lesnefsky, Production of reactive oxygen species by mitochondria: Central role of complex III. *J. Biol. Chem.* **278**, 36027 (2003). [doi:10.1074/jbc.M304854200](https://doi.org/10.1074/jbc.M304854200) [Medline](#)
23. G. Miller, V. Shulaev, R. Mittler, Reactive oxygen signaling and abiotic stress. *Physiol. Plant.* **133**, 481 (2008). [doi:10.1111/j.1399-3054.2008.01090.x](https://doi.org/10.1111/j.1399-3054.2008.01090.x) [Medline](#)
24. J. Baguña, E. Saló, C. Auladell, *Development* **107**, 77 (1989).
25. M. V. Gustafsson *et al.*, Hypoxia requires notch signaling to maintain the undifferentiated cell state. *Dev. Cell* **9**, 617 (2005). [doi:10.1016/j.devcel.2005.09.010](https://doi.org/10.1016/j.devcel.2005.09.010) [Medline](#)
26. B. Keith, M. C. Simon, Hypoxia-inducible factors, stem cells, and cancer. *Cell* **129**, 465 (2007). [doi:10.1016/j.cell.2007.04.019](https://doi.org/10.1016/j.cell.2007.04.019) [Medline](#)
27. S. J. Morrison *et al.*, Culture in reduced levels of oxygen promotes clonogenic sympathoadrenal differentiation by isolated neural crest stem cells. *J. Neurosci.* **20**, 7370 (2000). [Medline](#)
28. J. Ma, D. S. Skibbe, J. F. Fernandes, V. Walbot, *Genome Biol.* **9**, R181 (2008).
29. W. C. Yang, D. Ye, J. Xu, V. Sundaresan, The *SPOROCTELESS* gene of *Arabidopsis* is required for initiation of sporogenesis and encodes a novel nuclear protein. *Genes Dev.* **13**, 2108 (1999). [doi:10.1101/gad.13.16.2108](https://doi.org/10.1101/gad.13.16.2108) [Medline](#)
30. C. Canales, A. M. Bhatt, R. Scott, H. Dickinson, EXS, a putative LRR receptor kinase, regulates male germline cell number and tapetal identity and promotes seed development in *Arabidopsis*. *Curr. Biol.* **12**, 1718 (2002). [doi:10.1016/S0960-9822\(02\)01151-X](https://doi.org/10.1016/S0960-9822(02)01151-X) [Medline](#)
31. G. Jia, X. Liu, H. A. Owen, D. Zhao, Signaling of cell fate determination by the TPD1 small protein and EMS1 receptor kinase. *Proc. Natl. Acad. Sci. U.S.A.* **105**, 2220 (2008). [doi:10.1073/pnas.0708795105](https://doi.org/10.1073/pnas.0708795105) [Medline](#)

32. K. Nonomura *et al.*, The *MSP1* gene is necessary to restrict the number of cells entering into male and female sporogenesis and to initiate anther wall formation in rice. *Plant Cell* **15**, 1728 (2003). [doi:10.1105/tpc.012401](https://doi.org/10.1105/tpc.012401) [Medline](#)
33. D. Z. Zhao, G. F. Wang, B. Speal, H. Ma, The *EXCESS MICROSPOROCYTES1* gene encodes a putative leucine-rich repeat receptor protein kinase that controls somatic and reproductive cell fates in the *Arabidopsis* anther. *Genes Dev.* **16**, 2021 (2002). [doi:10.1101/gad.997902](https://doi.org/10.1101/gad.997902) [Medline](#)
